# Supplementary material for: GI-SleepNet: A Highly Versatile Image-Based Sleep Classification Using a Deep Learning Algorithm
Source: MDPI journal article supplement (doi:10.3390/clockssleep3040041), 2021-11-01
Supplement: s1 [file s1]

1 epoch\_middle\_dense

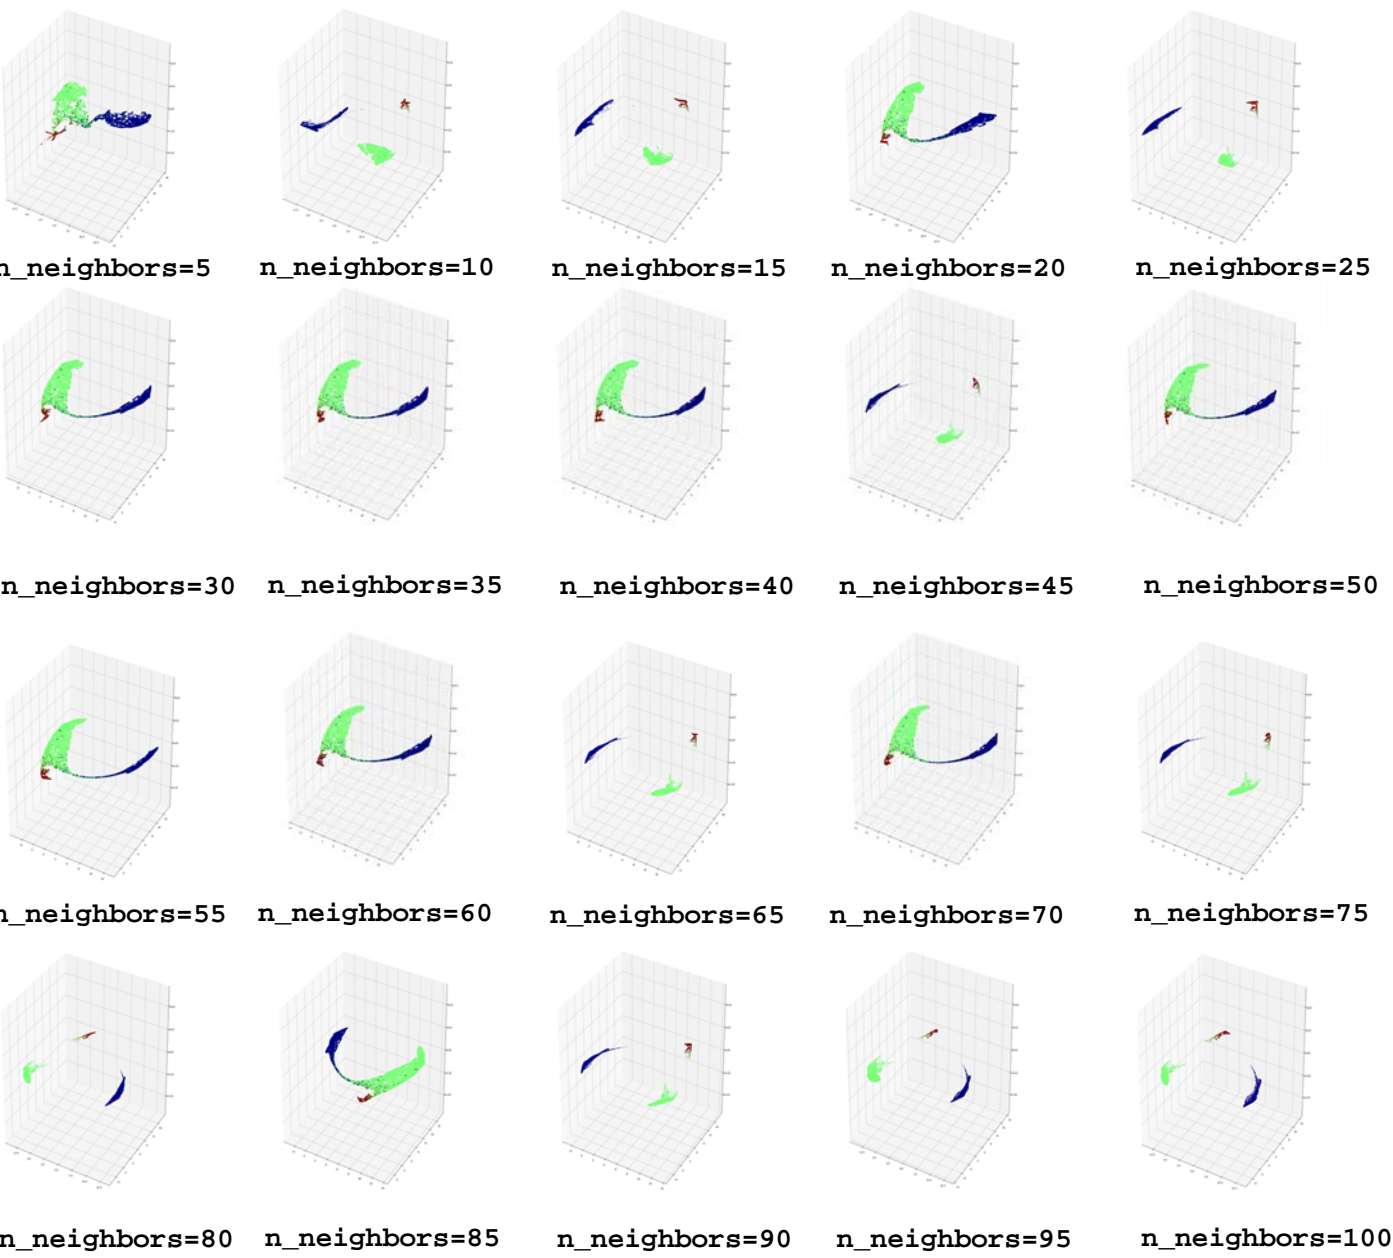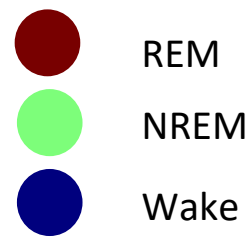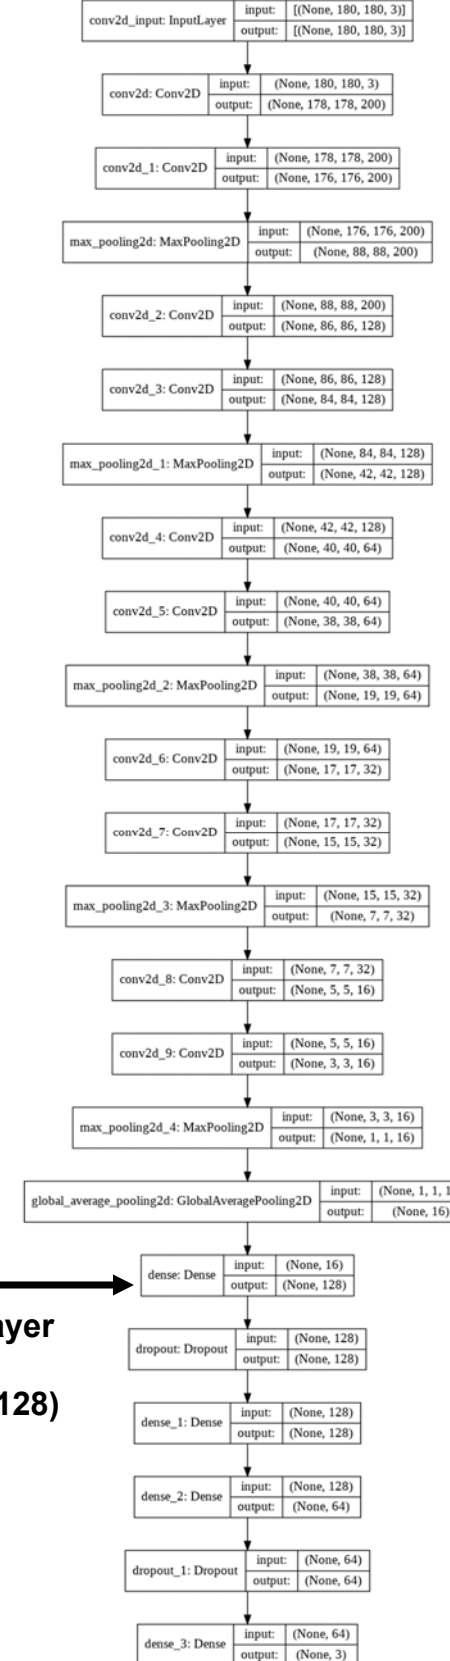

first dense layer  
outputs  
information(128)

Figure S1

1 epoch\_last\_dense

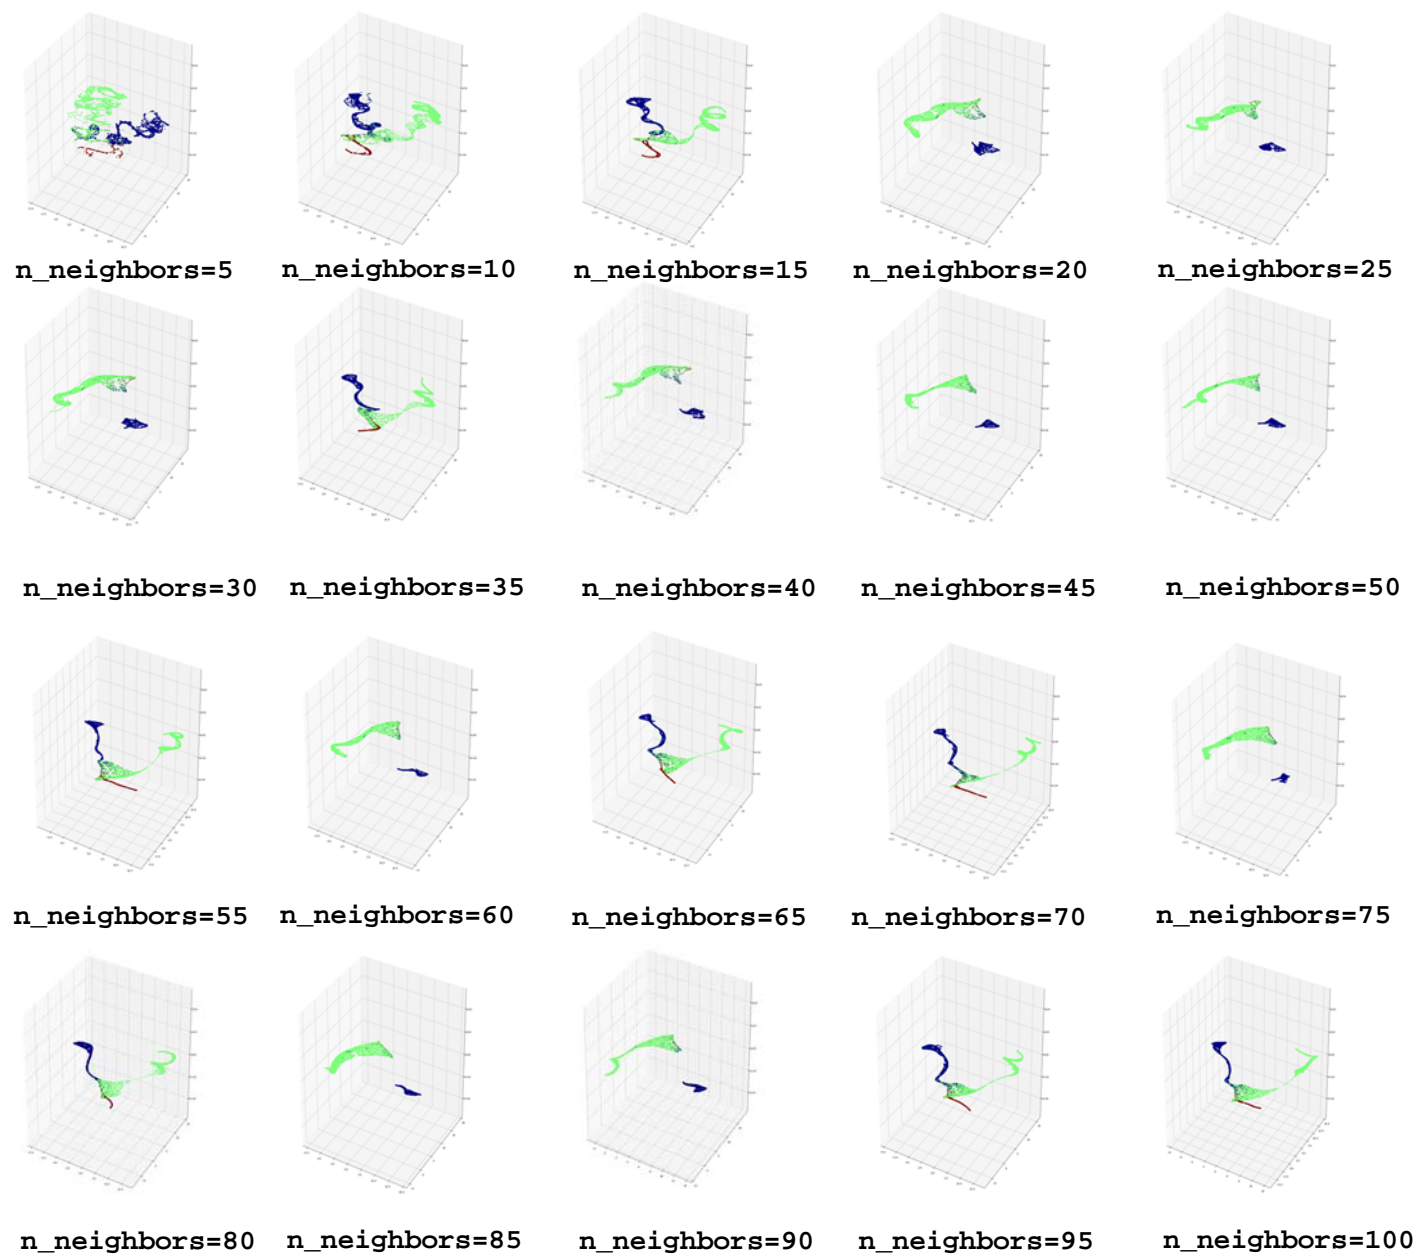

● REM  
● NREM  
● Wake

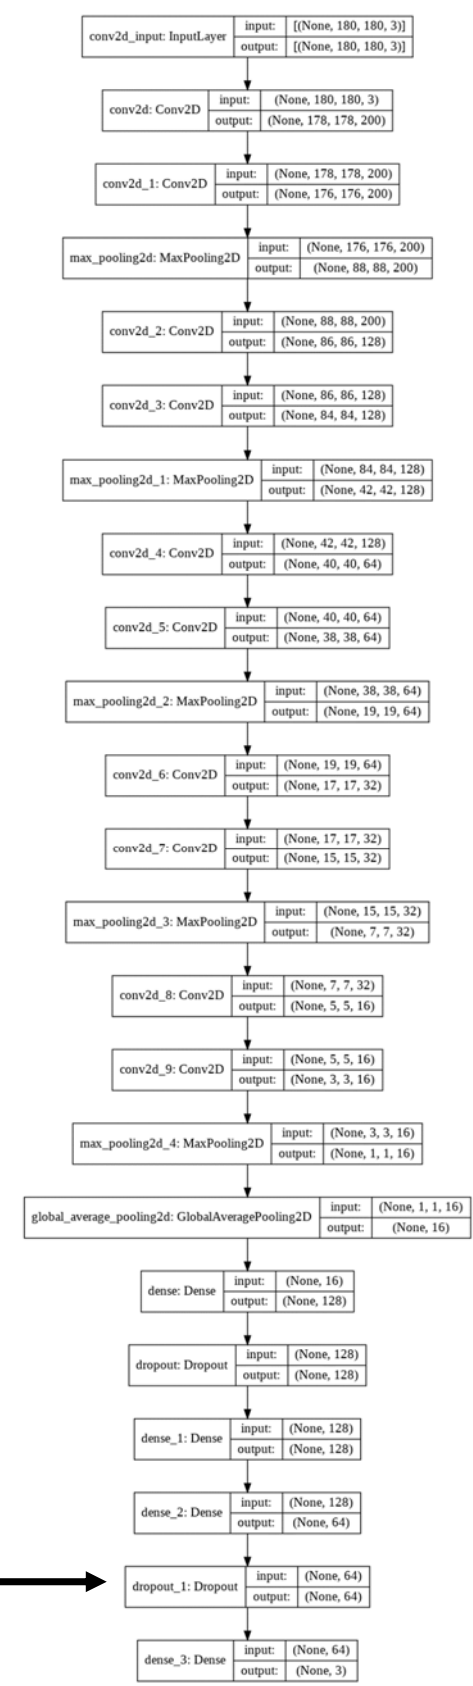

Last middle dense  
layer  
outputs  
information(64)

Figure S1

## 2 epoch\_middle\_dense

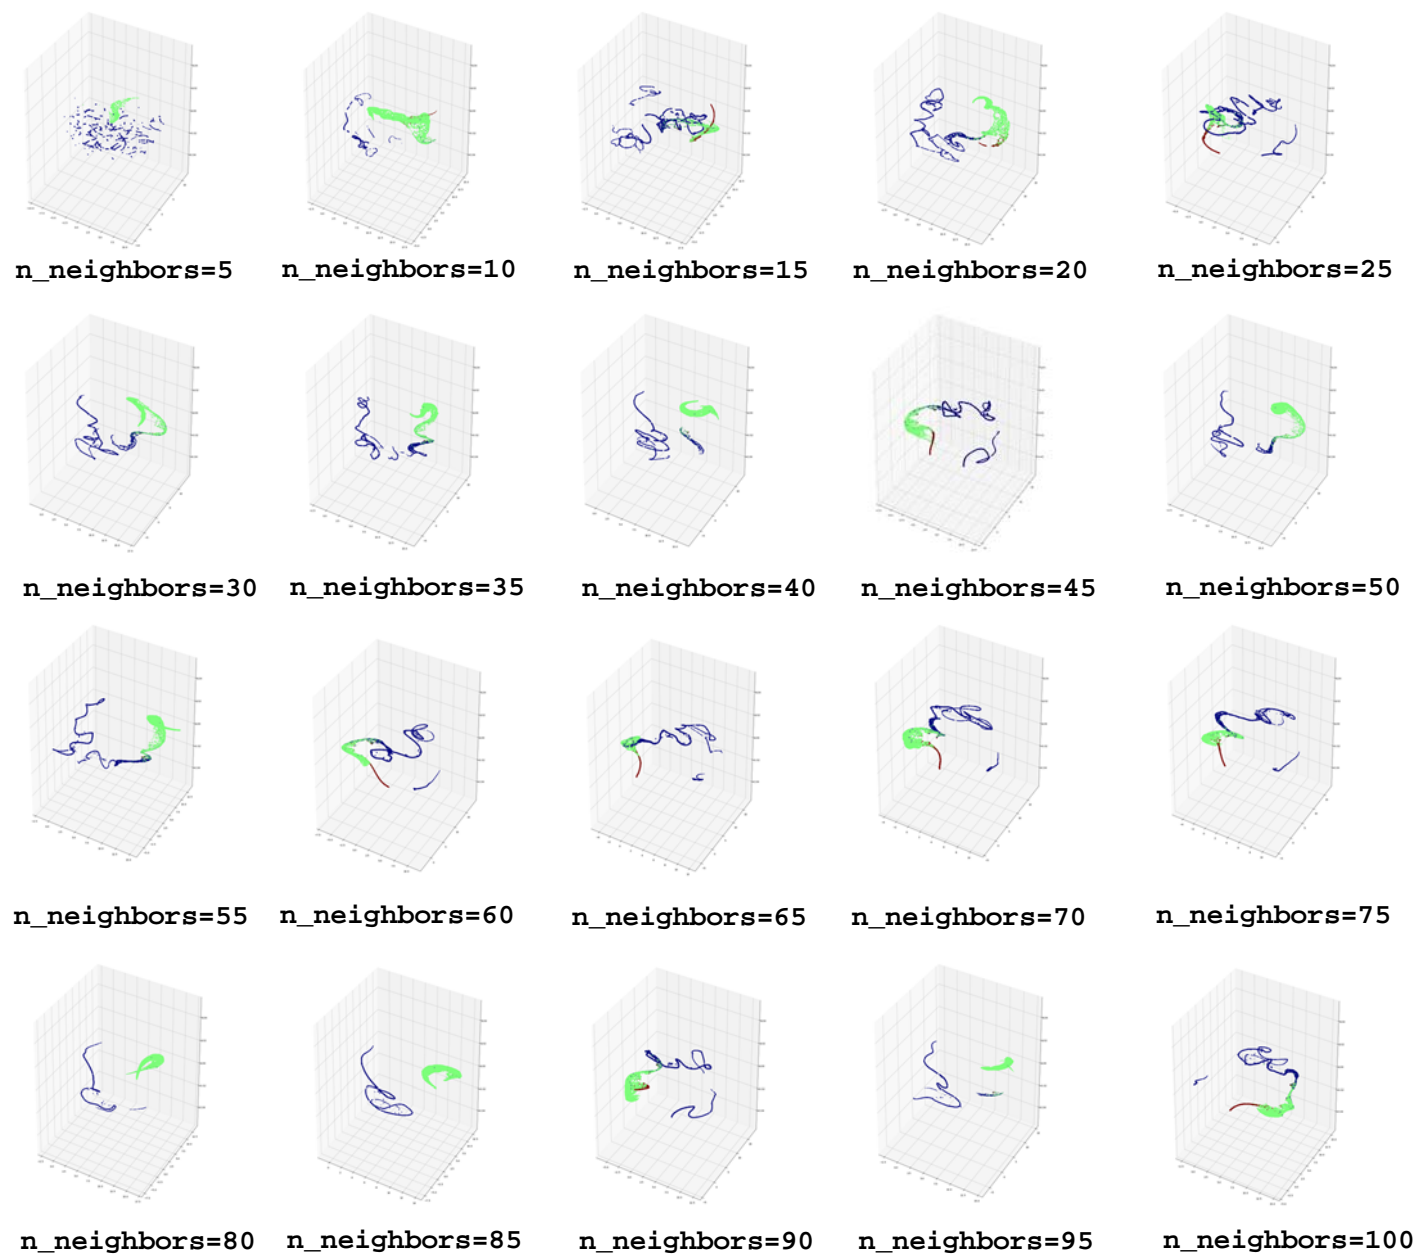

first dense layer  
outputs  
information(128)

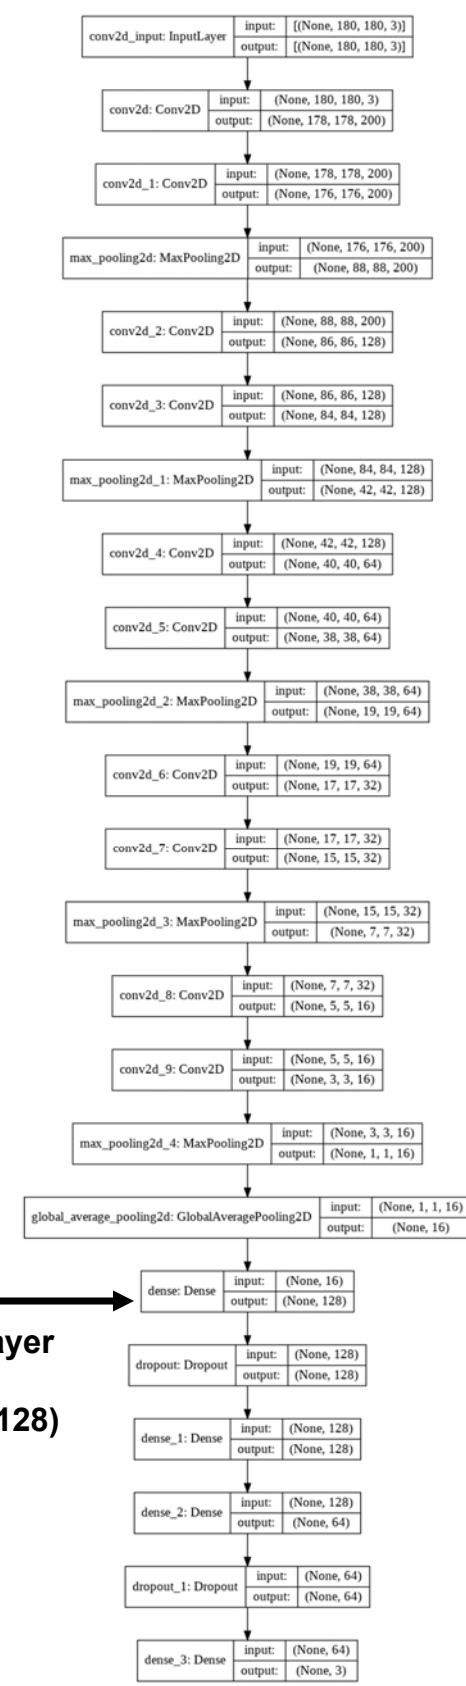

Figure S1

## 2 epoch\_last\_dense

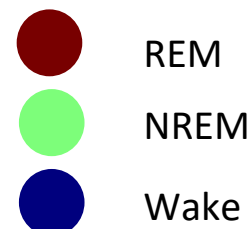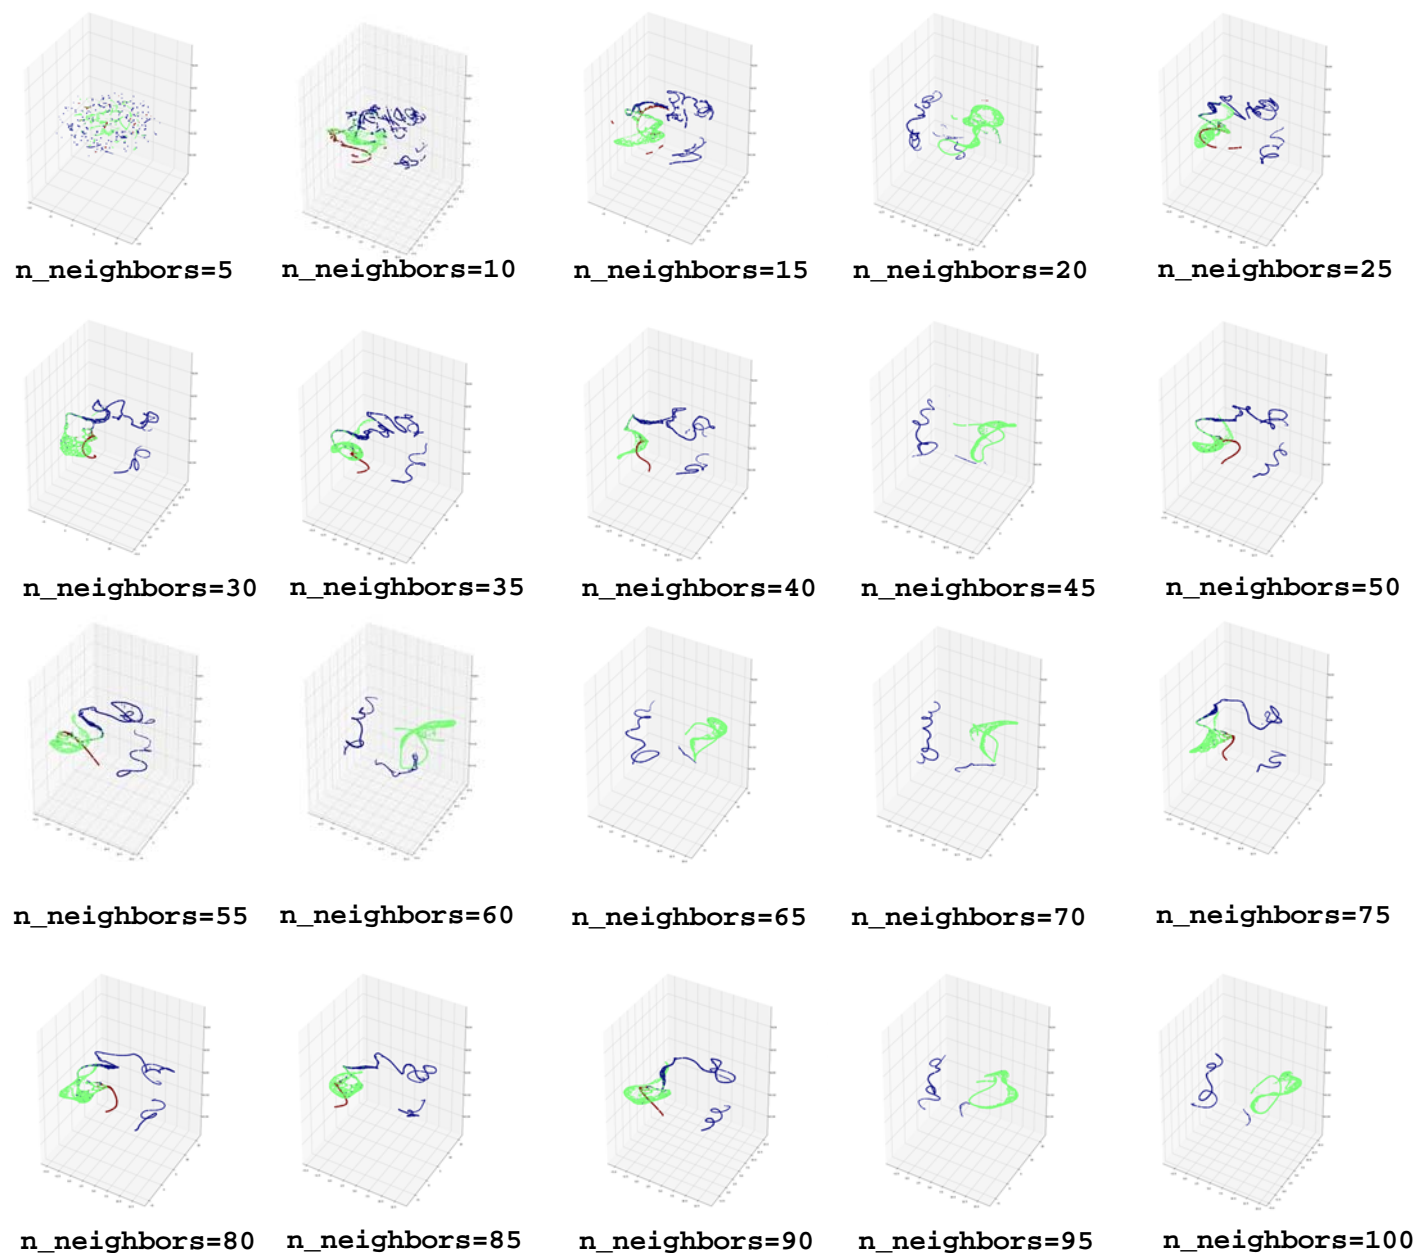

Last middle dense  
layer  
outputs  
information(64)

Figure S1



2 epoch\_gan\_middle\_dense

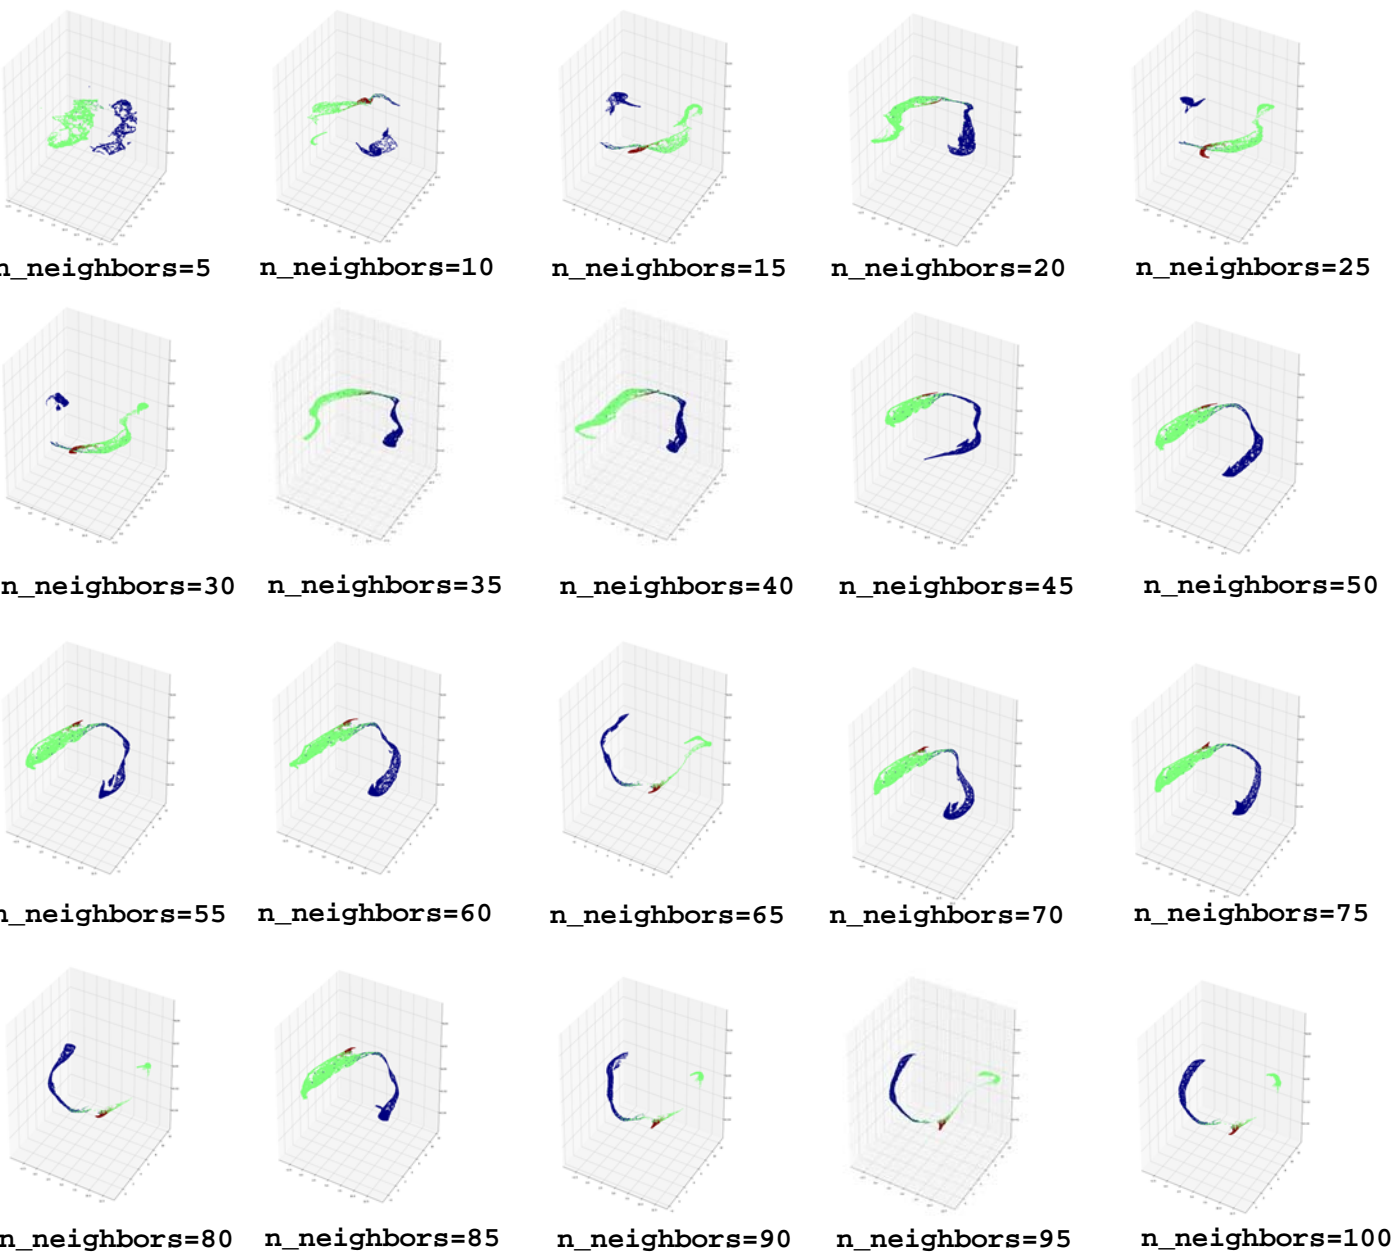

Figure S1

2 epoch\_gan\_last\_dense

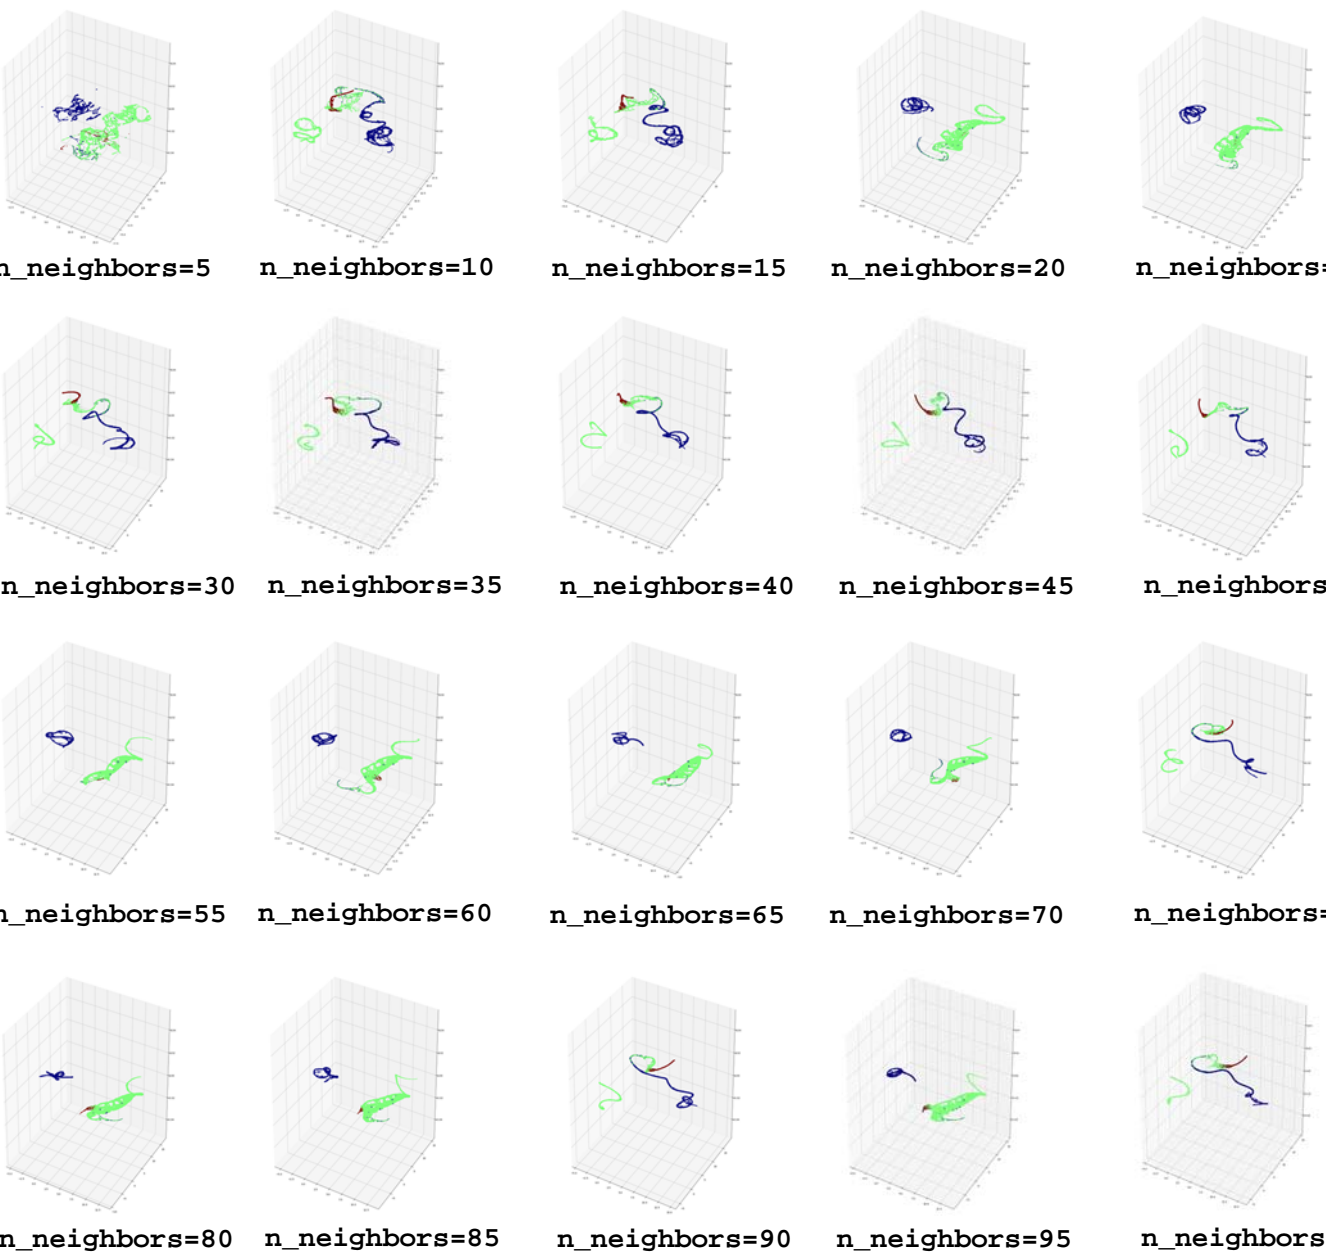

REM  
NREM  
Wake

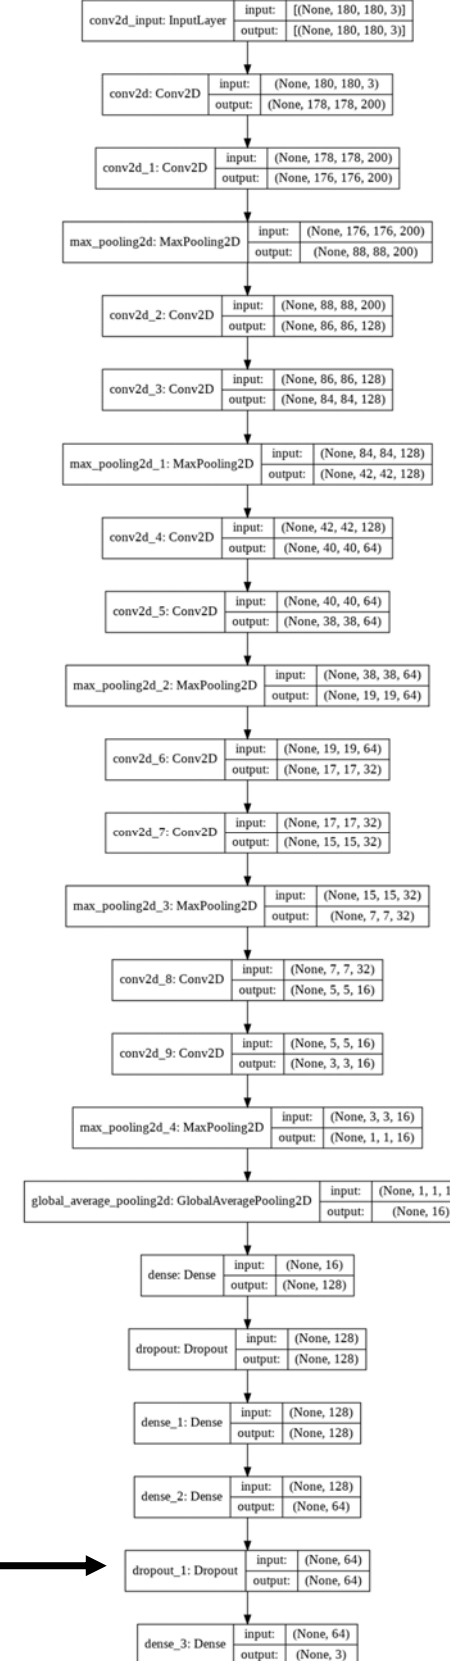

Last middle dense  
layer  
outputs  
information(64)

Figure S1

first middle dense layer outputs information(128)

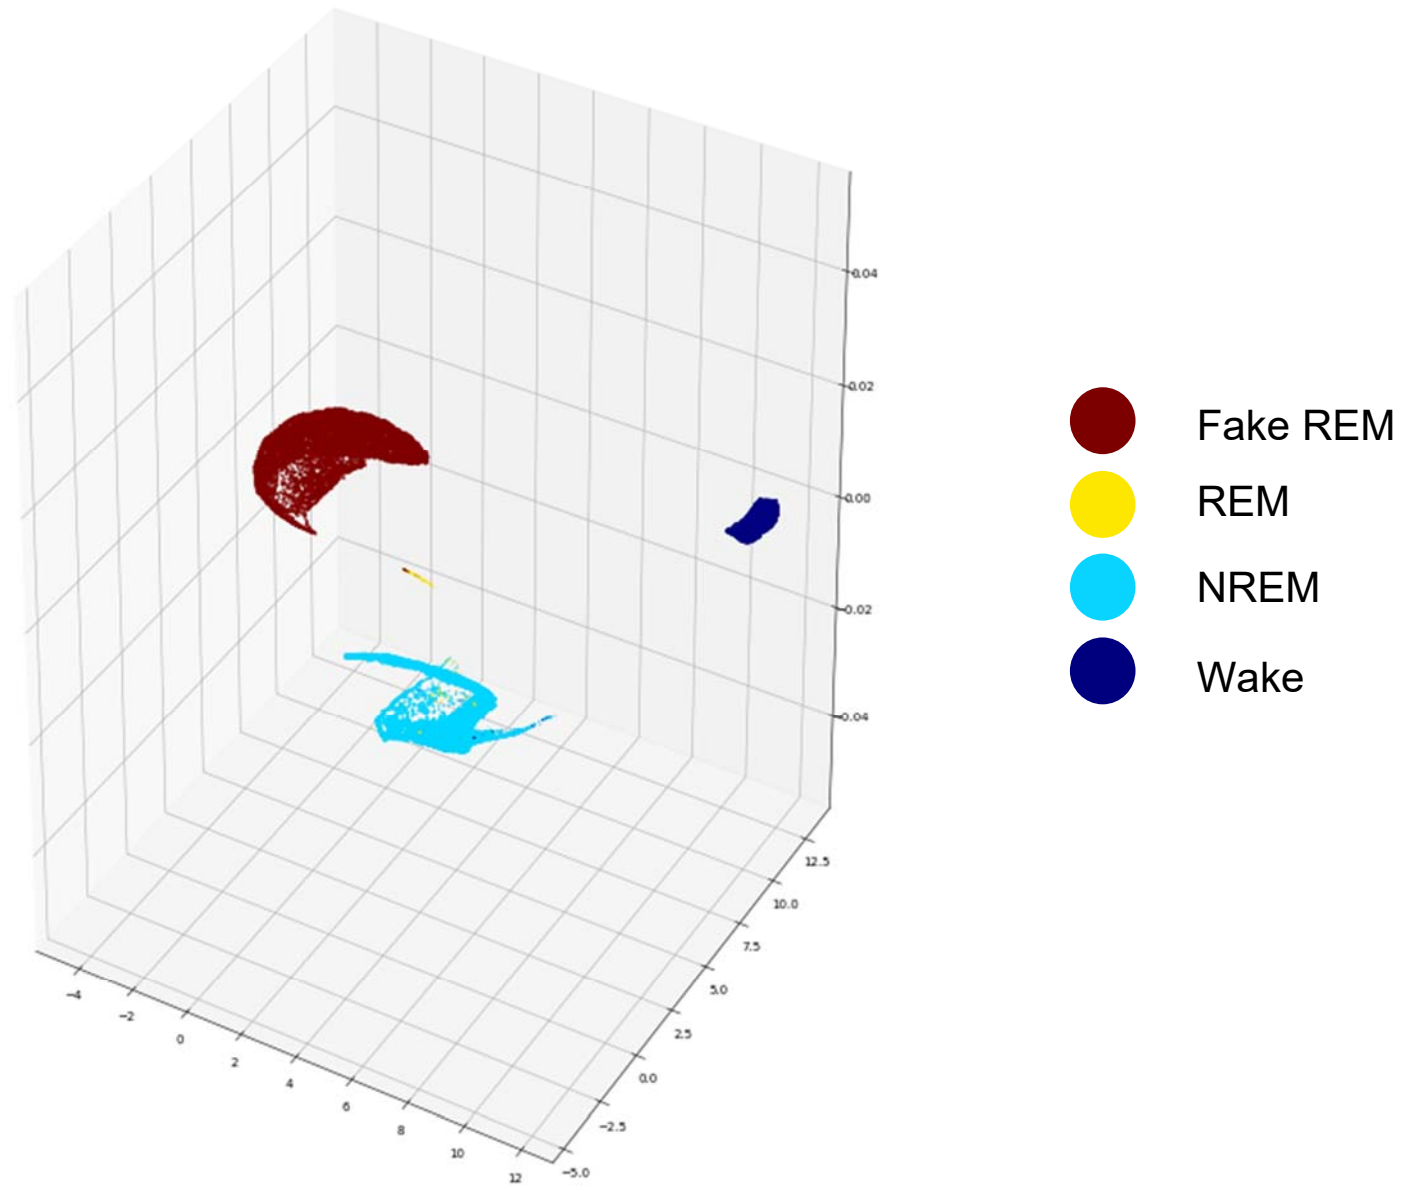

**n\_neighbors=75**

Figure S2A

last middle dense layer outputs information(64)

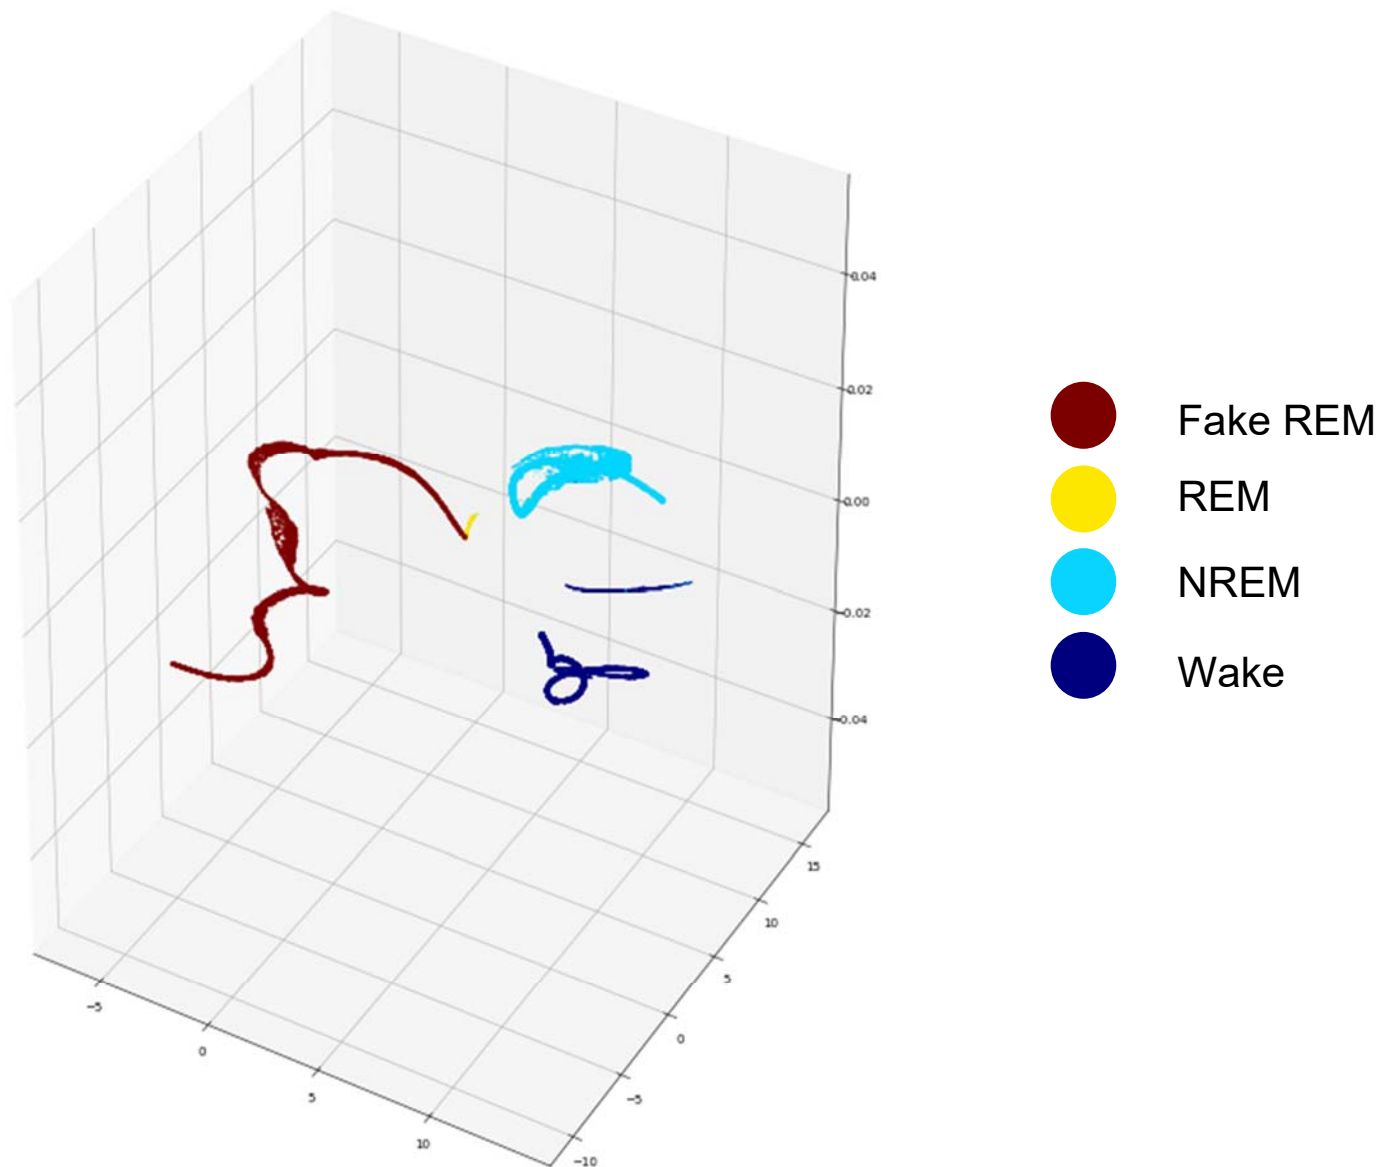

**n\_neighbors=75**

Figure S2B



# Scoring performance with the Forced correction filter

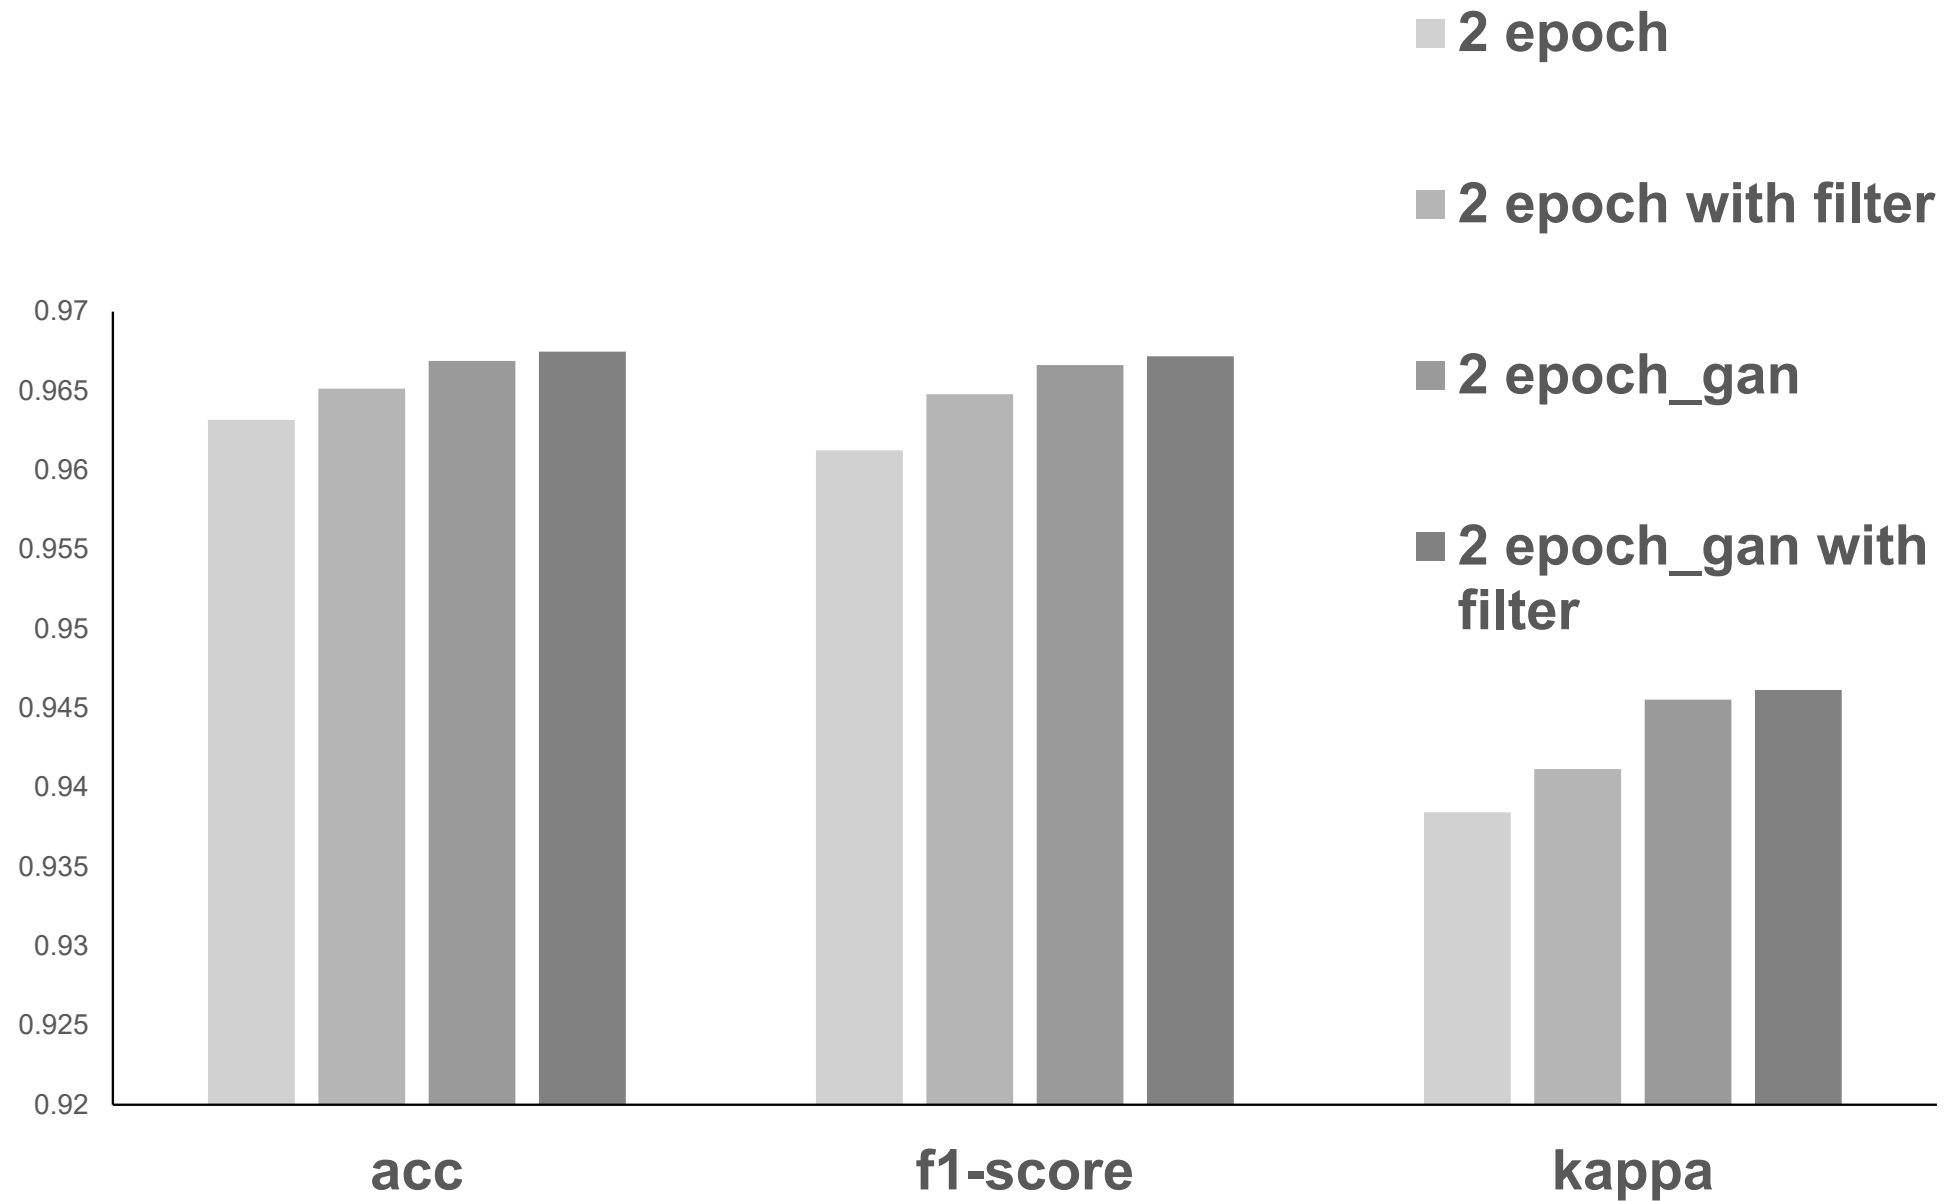

Figure S3

# Simple GUI based on standard Python interface tkinter

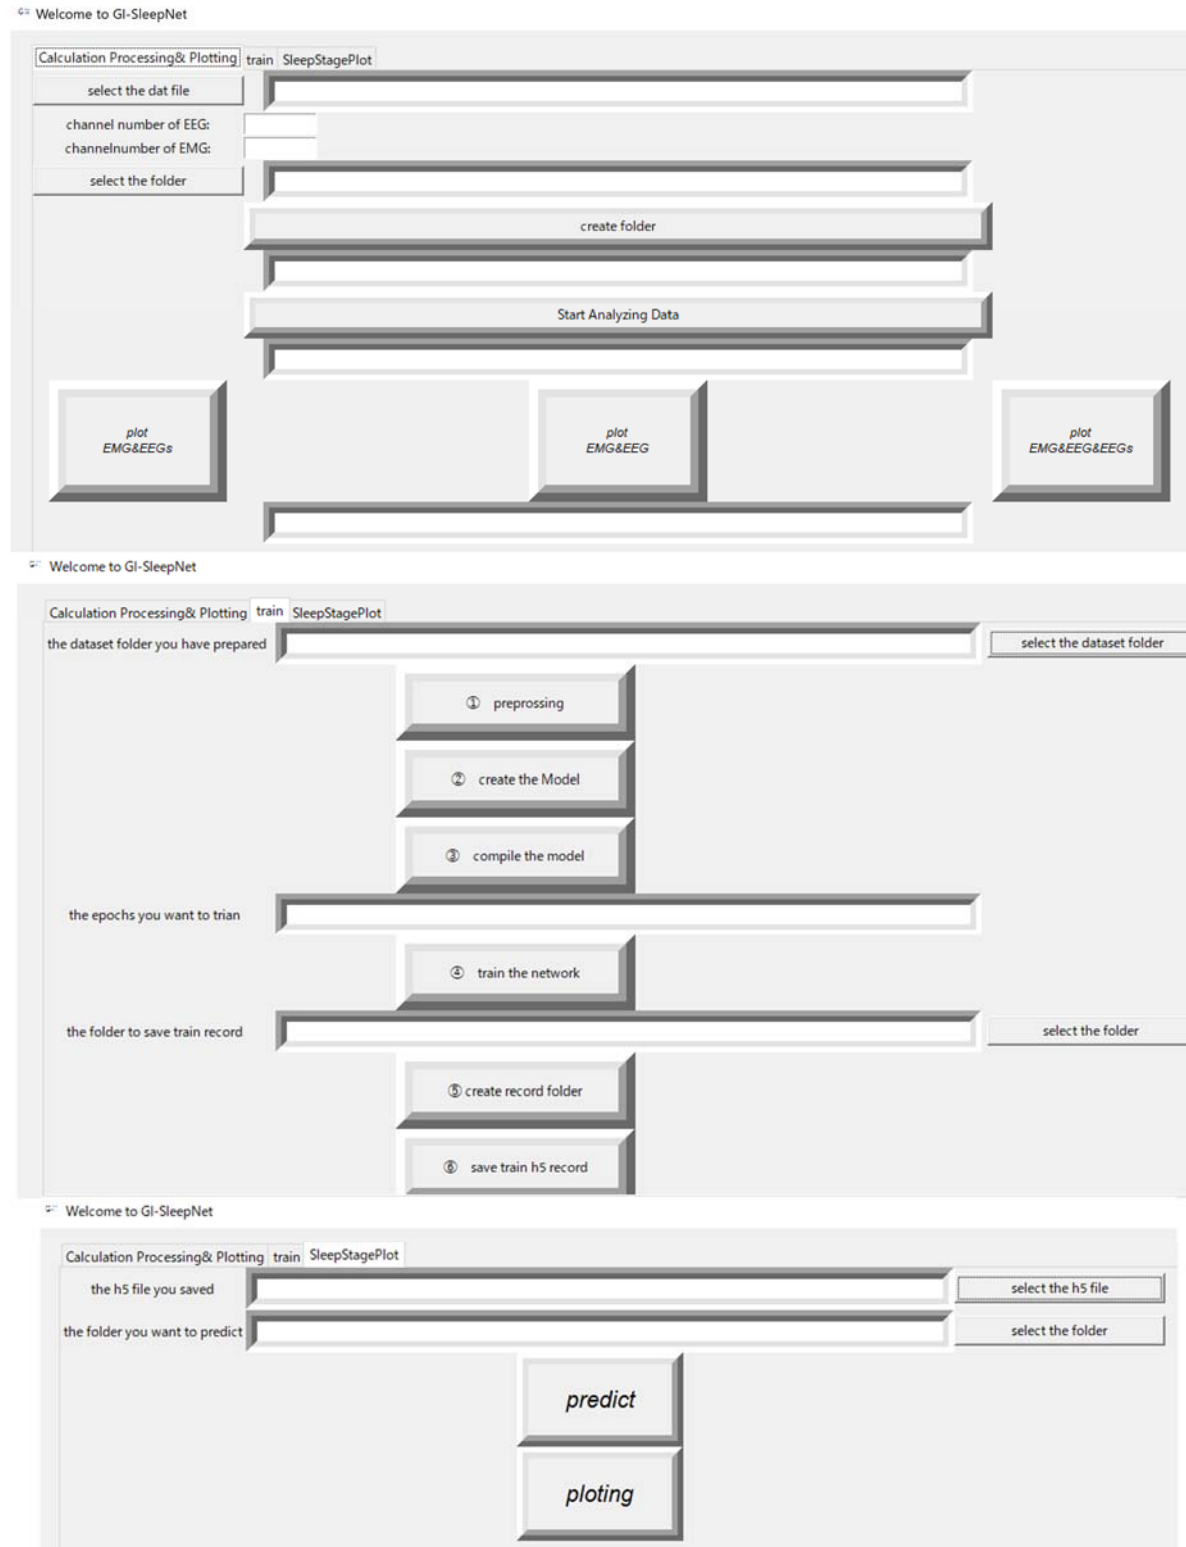

Figure S4
