# Supplementary material for: GI-SleepNet: A Highly Versatile Image-Based Sleep Classification Using a Deep Learning Algorithm
Source: MDPI journal article supplement (doi:10.3390/clockssleep3040041), 2021-11-01
Supplement: s1 [file s1]

| one_epoch |      |      | 2epoch |       |     | 2epoch_filter |      |     | 2epoch_gan |      |     | 2epoch_gan_f |      |     |
|-----------|------|------|--------|-------|-----|---------------|------|-----|------------|------|-----|--------------|------|-----|
| #1        |      |      | #1     |       |     | #1            |      |     | #1         |      |     | #1           |      |     |
| 7339      | 245  | 0    | 7159   | 426   | 0   | 7203          | 382  | 0   | 7230       | 354  | 1   | 7260         | 324  | 1   |
| 322       | 8457 | 69   | 87     | 8726  | 35  | 104           | 8709 | 35  | 141        | 8675 | 32  | 163          | 8653 | 32  |
| 27        | 204  | 6115 | 2      | 183   | 661 | 2             | 183  | 661 | 3          | 166  | 677 | 3            | 166  | 677 |
| #2        |      |      | #2     |       |     | #2            |      |     | #2         |      |     | #2           |      |     |
| 6380      | 208  | 1    | 6235   | 351   | 4   | 6285          | 301  | 4   | 6312       | 271  | 7   | 6345         | 238  | 7   |
| 405       | 9200 | 210  | 103    | 9616  | 96  | 120           | 9599 | 96  | 191        | 9523 | 101 | 217          | 9497 | 101 |
| 48        | 116  | 710  | 2      | 144   | 728 | 2             | 144  | 728 | 6          | 125  | 743 | 6            | 125  | 743 |
| #3        |      |      | #3     |       |     | #3            |      |     | #3         |      |     | #3           |      |     |
| 7544      | 220  | 13   | 7353   | 411   | 14  | 7410          | 354  | 14  | 7495       | 272  | 11  | 7534         | 233  | 11  |
| 252       | 8261 | 104  | 82     | 8492  | 43  | 89            | 8485 | 43  | 143        | 8433 | 41  | 149          | 8427 | 41  |
| 11        | 186  | 687  | 2      | 205   | 677 | 2             | 205  | 677 | 3          | 190  | 691 | 3            | 190  | 691 |
| #4        |      |      | #4     |       |     | #4            |      |     | #4         |      |     | #4           |      |     |
| 6555      | 255  | 8    | 6348   | 466   | 4   | 6437          | 377  | 4   | 6477       | 336  | 5   | 6533         | 280  | 5   |
| 333       | 8961 | 240  | 204    | 9241  | 90  | 231           | 9214 | 90  | 237        | 9220 | 78  | 252          | 9205 | 78  |
| 15        | 118  | 793  | 2      | 133   | 791 | 2             | 133  | 791 | 4          | 129  | 793 | 4            | 129  | 793 |
| #5        |      |      | #5     |       |     | #5            |      |     | #5         |      |     | #5           |      |     |
| 7366      | 288  | 5    | 7192   | 462   | 5   | 7295          | 359  | 5   | 7294       | 360  | 5   | 7362         | 292  | 5   |
| 269       | 8187 | 246  | 117    | 8471  | 114 | 131           | 8457 | 114 | 158        | 8418 | 126 | 177          | 8399 | 126 |
| 18        | 103  | 796  | 3      | 111   | 803 | 3             | 111  | 803 | 5          | 95   | 817 | 5            | 95   | 817 |
| #6        |      |      | #6     |       |     | #6            |      |     | #6         |      |     | #6           |      |     |
| 7321      | 168  | 4    | 7129   | 362   | 2   | 7295          | 359  | 5   | 7248       | 241  | 4   | 7290         | 200  | 3   |
| 102       | 8820 | 73   | 41     | 8914  | 40  | 131           | 8457 | 114 | 62         | 8902 | 31  | 83           | 8881 | 31  |
| 17        | 164  | 609  | 7      | 178   | 605 | 3             | 111  | 803 | 11         | 174  | 605 | 13           | 171  | 606 |
| #7        |      |      | #7     |       |     | #7            |      |     | #7         |      |     | #7           |      |     |
| 6663      | 108  | 7    | 6558   | 217   | 3   | 6593          | 182  | 3   | 6607       | 169  | 2   | 6633         | 143  | 2   |
| 171       | 9427 | 149  | 53     | 9636  | 59  | 59            | 9630 | 59  | 73         | 9612 | 63  | 82           | 9603 | 63  |
| 12        | 52   | 688  | 0      | 78    | 674 | 0             | 78   | 674 | 3          | 78   | 671 | 2            | 78   | 672 |
| #9        |      |      | #9     |       |     | #9            |      |     | #9         |      |     | #9           |      |     |
| 7504      | 180  | 3    | 7508   | 176   | 3   | 7536          | 149  | 2   | 7545       | 140  | 2   | 7560         | 125  | 2   |
| 58        | 8754 | 66   | 274    | 8587  | 18  | 302           | 8559 | 18  | 310        | 8546 | 23  | 337          | 8519 | 23  |
| 11        | 211  | 490  | 114    | 207   | 391 | 128           | 201  | 383 | 45         | 248  | 419 | 45           | 246  | 421 |
| #10       |      |      | #10    |       |     | #10           |      |     | #10        |      |     | #10          |      |     |
| 7774      | 231  | 1    | 7639   | 360   | 7   | 7713          | 286  | 7   | 7725       | 276  | 5   | 7778         | 223  | 5   |
| 140       | 8131 | 158  | 37     | 8305  | 88  | 42            | 8300 | 88  | 72         | 8265 | 93  | 82           | 8255 | 93  |
| 6         | 112  | 724  | 1      | 116   | 725 | 1             | 116  | 725 | 1          | 107  | 734 | 1            | 107  | 734 |
| #11       |      |      | #11    |       |     | #11           |      |     | #11        |      |     | #11          |      |     |
| 6991      | 111  | 13   | 6862   | 242   | 11  | 6903          | 201  | 11  | 6951       | 150  | 14  | 6977         | 124  | 14  |
| 96        | 9008 | 81   | 35     | 9141  | 10  | 67            | 9109 | 10  | 55         | 9113 | 18  | 93           | 9075 | 18  |
| 31        | 168  | 778  | 14     | 215   | 748 | 17            | 211  | 749 | 17         | 196  | 764 | 23           | 191  | 763 |
| #12       |      |      | #12    |       |     | #12           |      |     | #12        |      |     | #12          |      |     |
| 8295      | 66   | 4    | 8083   | 270   | 12  | 8135          | 218  | 12  | 8149       | 202  | 14  | 8188         | 163  | 14  |
| 459       | 7522 | 150  | 28     | 8006  | 98  | 33            | 8001 | 98  | 78         | 7948 | 106 | 92           | 7934 | 106 |
| 6         | 28   | 747  | 0      | 55    | 726 | 0             | 55   | 726 | 0          | 45   | 736 | 0            | 45   | 736 |
| #13       |      |      | #13    |       |     | #13           |      |     | #13        |      |     | #13          |      |     |
| 6519      | 163  | 2    | 6283   | 400   | 2   | 6344          | 339  | 2   | 6421       | 261  | 3   | 6455         | 227  | 3   |
| 107       | 9912 | 99   | 17     | 10013 | 88  | 58            | 9972 | 88  | 40         | 9971 | 107 | 84           | 9927 | 107 |
| 1         | 125  | 350  | 0      | 95    | 381 | 0             | 95   | 381 | 0          | 96   | 380 | 0            | 96   | 380 |
| #14       |      |      | #14    |       |     | #14           |      |     | #14        |      |     | #14          |      |     |
| 6992      | 123  | 4    | 6802   | 315   | 3   | 6842          | 275  | 3   | 6895       | 223  | 2   | 6918         | 200  | 2   |
| 86        | 9004 | 146  | 25     | 9186  | 25  | 76            | 9135 | 25  | 50         | 9147 | 39  | 104          | 9093 | 39  |
| 5         | 114  | 804  | 0      | 134   | 789 | 0             | 134  | 789 | 2          | 103  | 818 | 2            | 103  | 818 |
| #15       |      |      | #15    |       |     | #15           |      |     | #15        |      |     | #15          |      |     |
| 7267      | 74   | 2    | 7138   | 200   | 5   | 7170          | 168  | 5   | 7203       | 136  | 4   | 7225         | 114  | 4   |
| 107       | 9129 | 108  | 25     | 9221  | 98  | 50            | 9196 | 98  | 33         | 9235 | 76  | 57           | 9211 | 76  |
| 7         | 173  | 411  | 1      | 141   | 450 | 1             | 141  | 450 | 3          | 148  | 441 | 3            | 148  | 441 |

|      |      |     |      |       |     |      |      |     |      |      |     |
|------|------|-----|------|-------|-----|------|------|-----|------|------|-----|
| 20s  |      |     | 25s  |       |     | 30s  |      |     | 35s  |      |     |
| #1   |      |     | #1   |       |     | #1   |      |     | #1   |      |     |
| 7007 | 578  | 0   | 7058 | 527   | 0   | 7123 | 462  | 0   | 7170 | 415  | 0   |
| 137  | 8687 | 24  | 127  | 8698  | 23  | 127  | 8686 | 35  | 148  | 8672 | 28  |
| 23   | 391  | 432 | 15   | 368   | 463 | 10   | 286  | 550 | 9    | 248  | 589 |
| #2   |      |     | #2   |       |     | #2   |      |     | #2   |      |     |
| 6042 | 548  | 0   | 6110 | 480   | 0   | 6180 | 410  | 0   | 6228 | 361  | 1   |
| 208  | 9545 | 62  | 175  | 9585  | 55  | 174  | 9567 | 74  | 192  | 9546 | 77  |
| 18   | 322  | 534 | 14   | 276   | 584 | 12   | 234  | 628 | 9    | 204  | 661 |
| #3   |      |     | #3   |       |     | #3   |      |     | #3   |      |     |
| 7165 | 608  | 5   | 7268 | 502   | 8   | 7357 | 413  | 8   | 7437 | 332  | 9   |
| 134  | 8465 | 18  | 113  | 8486  | 18  | 129  | 8455 | 33  | 145  | 8445 | 27  |
| 12   | 465  | 407 | 8    | 400   | 476 | 8    | 334  | 542 | 7    | 279  | 598 |
| #4   |      |     | #4   |       |     | #4   |      |     | #4   |      |     |
| 6139 | 679  | 0   | 6189 | 629   | 0   | 6317 | 501  | 0   | 6412 | 406  | 0   |
| 236  | 9262 | 37  | 212  | 9288  | 35  | 234  | 9255 | 46  | 256  | 9227 | 52  |
| 12   | 388  | 526 | 8    | 327   | 591 | 8    | 271  | 647 | 7    | 227  | 692 |
| #5   |      |     | #5   |       |     | #5   |      |     | #5   |      |     |
| 6550 | 1105 | 4   | 6727 | 929   | 3   | 6943 | 712  | 4   | 7087 | 570  | 2   |
| 153  | 8505 | 44  | 122  | 8530  | 50  | 129  | 8503 | 70  | 149  | 8485 | 68  |
| 15   | 307  | 595 | 11   | 247   | 659 | 6    | 211  | 700 | 5    | 181  | 731 |
| #6   |      |     | #6   |       |     | #6   |      |     | #6   |      |     |
| 6487 | 1002 | 4   | 6741 | 748   | 4   | 6955 | 536  | 2   | 7078 | 414  | 1   |
| 36   | 8953 | 6   | 26   | 8958  | 11  | 25   | 8952 | 18  | 51   | 8927 | 17  |
| 3    | 500  | 287 | 2    | 395   | 393 | 5    | 327  | 458 | 10   | 263  | 517 |
| #7   |      |     | #7   |       |     | #7   |      |     | #7   |      |     |
| 6468 | 310  | 0   | 6496 | 281   | 1   | 6539 | 239  | 0   | 6575 | 202  | 1   |
| 108  | 9625 | 15  | 77   | 9643  | 28  | 76   | 9633 | 39  | 83   | 9629 | 36  |
| 10   | 322  | 420 | 8    | 219   | 525 | 5    | 182  | 565 | 4    | 142  | 606 |
| #9   |      |     | #9   |       |     | #9   |      |     | #9   |      |     |
| 7442 | 243  | 2   | 7445 | 240   | 2   | 7486 | 198  | 3   | 7513 | 172  | 2   |
| 176  | 8697 | 6   | 141  | 8731  | 7   | 202  | 8669 | 8   | 236  | 8633 | 10  |
| 27   | 522  | 163 | 28   | 428   | 256 | 38   | 370  | 304 | 42   | 331  | 339 |
| #10  |      |     | #10  |       |     | #10  |      |     | #10  |      |     |
| 7401 | 603  | 2   | 7501 | 502   | 3   | 7596 | 406  | 4   | 7665 | 340  | 1   |
| 115  | 8287 | 28  | 104  | 8279  | 47  | 88   | 8293 | 49  | 75   | 8299 | 56  |
| 12   | 316  | 514 | 9    | 219   | 614 | 7    | 188  | 647 | 3    | 167  | 672 |
| #11  |      |     | #11  |       |     | #11  |      |     | #11  |      |     |
| 6597 | 518  | 0   | 6700 | 411   | 4   | 6806 | 306  | 3   | 6890 | 219  | 6   |
| 45   | 9140 | 1   | 35   | 9149  | 2   | 31   | 9151 | 4   | 52   | 9129 | 5   |
| 22   | 456  | 499 | 25   | 352   | 600 | 18   | 309  | 650 | 21   | 283  | 673 |
| #12  |      |     | #12  |       |     | #12  |      |     | #12  |      |     |
| 7808 | 557  | 0   | 7900 | 464   | 1   | 8013 | 349  | 3   | 8100 | 258  | 7   |
| 200  | 7923 | 9   | 98   | 8017  | 17  | 88   | 8012 | 32  | 94   | 7989 | 49  |
| 17   | 235  | 529 | 5    | 120   | 656 | 2    | 98   | 681 | 3    | 80   | 698 |
| #13  |      |     | #13  |       |     | #13  |      |     | #13  |      |     |
| 6106 | 578  | 1   | 6170 | 514   | 1   | 6270 | 413  | 2   | 6329 | 355  | 1   |
| 128  | 9960 | 30  | 76   | 10011 | 31  | 63   | 9991 | 64  | 55   | 9997 | 66  |
| 1    | 227  | 248 | 0    | 194   | 282 | 0    | 155  | 321 | 0    | 131  | 345 |
| #14  |      |     | #14  |       |     | #14  |      |     | #14  |      |     |
| 6644 | 477  | 2   | 6718 | 401   | 1   | 6816 | 303  | 1   | 6870 | 249  | 1   |
| 64   | 9159 | 13  | 45   | 9181  | 10  | 39   | 9176 | 21  | 40   | 9174 | 22  |
| 15   | 347  | 561 | 12   | 269   | 642 | 7    | 223  | 693 | 4    | 179  | 740 |
| #15  |      |     | #15  |       |     | #15  |      |     | #15  |      |     |
| 6864 | 478  | 1   | 6979 | 362   | 2   | 7075 | 267  | 1   | 7142 | 200  | 1   |
| 63   | 9256 | 25  | 38   | 9276  | 30  | 38   | 9256 | 50  | 45   | 9245 | 54  |
| 5    | 326  | 261 | 2    | 307   | 283 | 2    | 239  | 351 | 4    | 207  | 381 |

[illegible]
